# Supplementary material for: Telomere attrition and restoration in the normal teleost Oryzias latipes are linked to growth rate and telomerase activity at each life stage
Source: publisher site journal article supplement (doi:10.18632/aging.100873), 2016-01-20
Supplement: Supplementary file [file aging-v8i1-100873-supplementary-material-SD1.pdf]

SUPPLEMENTARY FIGURE

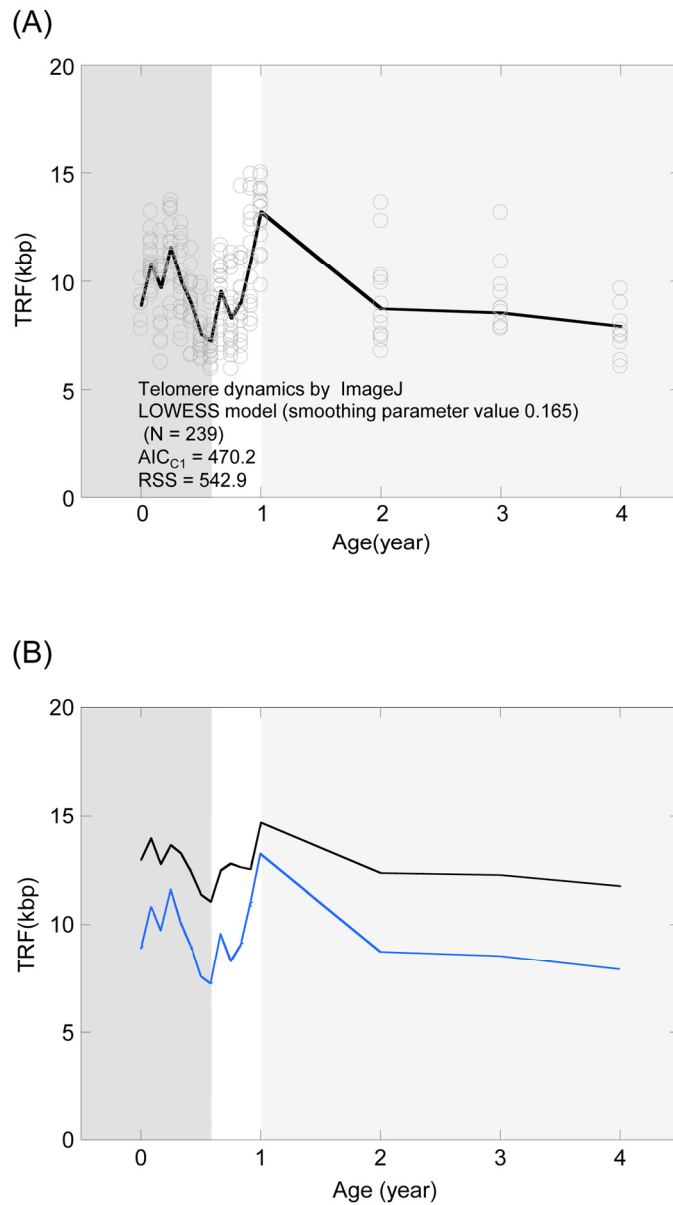

**Figure S1. TRF length from embryo to extreme old age in the medaka.** (A) Scatterplots of telomere dynamics obtained using ImageJ and the fitted regression model. (B) Comparison of the regression curve of telomere dynamics obtained using Telometric and ImageJ. Black curve, Telometric; Blue curve, ImageJ. G (dark gray shading), growth stage; Ado (clear), adolescent stage; Adu (light gray shading), adult stage.
